# Supplementary material
Source: PubMed Central journal article supplement (PMC2765790)

## **Expanded Materials and Methods**

### **Antibodies**

Anti-Nampt antibody was purchased from Bethyl and Abcam. Other antibodies include anti-Sirt1 (Upstate Biotechnology), anti-Bcl-xL (Pharmingen), anti-tubulin (Sigma), anti-cleaved-caspase 3 (Cell Signaling), anti-LC3 (MBL), and anti-p62 (American Research Products, Inc.) anti-cytochrome C (Sigma), anti-cytochrome c oxidase I (COX I) (Sigma), anti-hyper-acetylated Histone H4 (Millipore), anti-phospho-AMPK $\alpha$  (Thr172), anti-AMPK, anti-phospho-4E-BP1 (Thr37/46), anti-4E-BP1, anti-phospho-p70 S6K (Thr389), anti-p70 S6K, anti-phospho-mTOR (Ser2448), anti-mTOR, anti-phospho-Akt (Ser473), anti-Akt, anti-acetyl-lysine, anti-acetyl-Histone H3 (Lys 23) (Cell Signaling), anti-Becclin 1 (BD Biosciences), and anti-GAPDH (Chemicon) antibodies.

### **Adenovirus vectors**

We made replication-defective human adenovirus type 5 (devoid of E1) harboring Nampt and shRNA-Nampt. Adenovirus harboring  $\beta$ -galactosidase or scramble shRNA was used as a control. Adenoviruses harboring Sirt1, shRNA-Sirt1, Bcl-xL, and GFP-LC3 have been described <sup>1,2</sup>.

### **Primary cultures of neonatal rat ventricular myocytes**

Primary cultures of ventricular cardiac myocytes were prepared from 1-day-old Crl: (WI) BR-Wistar rats (Harlan). A cardiac myocyte-rich fraction was obtained by centrifugation through a discontinuous Percoll gradient. Cells were cultured in complete medium (CM) containing Dulbecco's modified Eagle's medium (DMEM)/F-12 supplemented with 5% horse serum, 4  $\mu$ g/mL transferrin, 0.7 ng/mL sodium selenite (Life Technologies, Inc.), 2 g/L bovine serum albumin

(fraction V), 3 mmol/L pyruvic acid, 15 mmol/L HEPES, 100  $\mu$ mol/L ascorbic acid, 100  $\mu$ g/mL ampicillin, 5  $\mu$ g/mL linoleic acid, and 100  $\mu$ mol/L 5-bromo-2'-deoxyuridine (Sigma) <sup>3</sup>.

### **TUNEL staining in cultured cardiac myocytes**

Myocytes were fixed in PBS containing 3.7% paraformaldehyde. Staining was performed using the In Situ Cell Death Detection kit (Roche) <sup>4</sup>.

### **Hairpin2**

A 196 bp double stranded DNA fragment was prepared using primers 5'-CCCTGTAGCCGCTTAAG-3' and 5'-GGTCGAGGTGCCGTAAAGCA-3' complementary to pBluescript SK(-) (Stratagene). Polymerase chain reaction (PCR) with *PfuUltra* polymerase was performed with 16.6  $\mu$ mol/L Texas Red-12-dUTP (Molecular Probes), 16.6  $\mu$ mol/L dTTP, 50  $\mu$ mol/L dATP, 50  $\mu$ mol/L dCTP and 50  $\mu$ mol/L dGTP. Agarose gel electrophoresis of an aliquot of the reaction showed a single product. Cells were fixed and permeabilized in methanol and acetone. After washing with PBS, a mix of 50 mmol/L Tris-HCl, pH 7.8, 10 mmol/L MgCl<sub>2</sub>, 10 mmol/L DTT, 1 mmol/L ATP, 25  $\mu$ g/mL BSA, 15% polyethylene glycol (8,000 mol wt, Sigma), Texas red-labeled DNA fragment at 1  $\mu$ g /mL and DNA T4 ligase (Boehringer Mannheim) at 25 U/mL was added. Sections were covered with glass coverslips and placed in a humidified box for 1 h. The sections were thoroughly washed in 70°C water. The samples were observed under a fluorescent microscope immediately after counterstaining with 10  $\mu$ g/mL 4,6-diamidino-2-phenylindole (DAPI) <sup>5</sup>.

### **NAD<sup>+</sup> measurement**

We measured the level of  $\text{NAD}^+$  in cardiac myocytes and in the heart, using the EnzyChrom  $\text{NAD}^+/\text{NADH}$  Assay Kit, according to the manufacturer's protocol (#ECND-100, Bioassay Systems, Hayward, CA). The method is based on an alcohol dehydrogenase cycling reaction, in which a tetrazolium dye is reduced by  $\text{NADH}$  in the presence of phenazine methosulfate. The intensity of the reduced product color, measured at 565 nm, is proportionate to the  $\text{NAD}^+/\text{NADH}$  concentration in the sample. This assay method allows one to measure  $\text{NAD}^+$  and  $\text{NADH}$  from duplicate samples. Although we measured  $\text{NAD}^+$  in all samples, we only measured  $\text{NADH}$  in heart homogenates because the level of  $\text{NADH}$  was within the detection range of the assay in the *in vivo* heart samples but it was sometimes below the reliable detection range in cardiac myocyte samples. For *in vitro* samples, myocytes cultured on a 10 cm dish were treated with trypsin, washed twice with cold PBS, and pelleted through centrifugation. Myocytes were separated into two parts, one for  $\text{NAD}^+$  measurement and the other for protein concentration. Cell pellets were resuspended in 1.5 mL eppendorf tubes with 100  $\mu\text{L}$   $\text{NAD}^+$  extraction buffer (containing 0.40% hydrochloric acid). For the heart samples, the heart (20 mg) was homogenated with 100  $\mu\text{L}$   $\text{NAD}^+$  extraction buffer for  $\text{NAD}^+$  determination or with 100  $\mu\text{L}$   $\text{NADH}$  extraction buffer for  $\text{NADH}$  determination. Extracts were heated at  $60^\circ\text{C}$  for five minutes. Twenty  $\mu\text{L}$  of assay buffer (containing Tris (hydroxymethyl) aminomethane 3.0% and BSA 0.10%) was added to the extracts followed by 100  $\mu\text{L}$   $\text{NADH}$  extraction buffer for  $\text{NAD}^+$  measurement or 100  $\mu\text{L}$   $\text{NAD}^+$  extraction buffer for  $\text{NADH}$  measurement (to neutralize the extracts). The samples were vortexed and centrifuged at 13,200 rpm for five minutes. Supernatants (120  $\mu\text{L}$ ) were then mixed with Working Reagent, containing 50  $\mu\text{L}$  assay buffer, 1  $\mu\text{L}$  alcohol dehydrogenase, 10  $\mu\text{L}$  1% (vol) ethanol, 14  $\mu\text{L}$  phenazine methosulfate, and 14  $\mu\text{L}$  tetrazolium dye. Optical density at 565 nm was recorded at time zero ( $\text{OD}_0$ ) and at 15 minutes ( $\text{OD}_{15}$ ) with a 96-well plate reader spectrophotometer. The difference in the absorbances at

time zero and 15 minutes ( $OD_0-OD_{15}$ ) of the test sample was compared with that of the standard solution to determine the  $NAD^+$  or NADH concentration. Myocytes (the other half) or the heart samples were lysed with RIPA buffer to measure protein concentration. The amount of  $NAD^+$  and NADH was normalized to the protein concentration.

### **Measurement of intracellular ATP contents**

Intracellular ATP contents were measured using an ATP Bioluminescent Assay Kit (Sigma) <sup>2</sup>. Cells were lysed directly in the somatic-cell ATP-releasing agent, and the lysates were assayed according to the manufacturer's instructions, using a 1:625 dilution of the ATP assay mix. Light emitted was measured using a luminometer. ATP contents were calculated by comparison with a standard curve derived from known concentrations of ATP, ranging from 0.01 to 10 pmol/L.

### **Construction of short hairpin RNA (shRNA) adenoviral expression vectors**

p*Silencer* 1.0-U6 expression vector was purchased from Ambion. The U6 RNA polymerase III promoter and the polylinker region were subcloned into the adenoviral shuttle vector pDC311 (Microbix). The hairpin-forming oligo, corresponding to bases 54-72 (5'-CAAGGTTACTCACTATAAAATTTCAAGAGATTTTATAGTGAGTAACCTTGTTTTTT-3') of the rat *nampt* cDNA and its antisense with *Apal* and *Hind* III overhangs were synthesized, annealed, and subcloned distal to the U6 promoter. The loop sequence is underlined. A recombinant adenovirus was generated using homologous recombination in 293 cells.

### **Immunoblot analysis**

For immunoblot analysis, cells were lysed in lysis buffer (50 mmol/L Tris-HCl pH 7.4, 0.1% SDS,

1% IGEPAL CA-630, 0.15 mol/L NaCl, 0.25% Na-deoxycholate, and 1 mmol/L EDTA supplemented with protease inhibitors). Densitometric analysis was performed using Scion Image software (Scion).

### **Evaluation of GFP-LC3 dots**

Cardiac myocytes were grown on gelatinized coverslips. Myocytes were transduced with Ad-GFP-LC3 for 48 hours. Samples were mounted using SlowFade Light Antifade Kit (Molecular Probes) and the fluorescence of GFP-LC3 was observed under a fluorescence microscope. The number of cells with GFP-LC3 dots was counted in five independent visual fields <sup>2</sup>.

### **Reverse Transcription–Polymerase Chain Reaction**

Total RNA was subjected to reverse transcription–quantitative polymerase chain reaction (RT-qPCR) as described previously.

### **Immunohistochemistry**

The heart specimens were fixed with formalin, embedded in paraffin, and sectioned at 6- $\mu$ m thickness. The method of immunostaining has been described <sup>6</sup>

### **Echocardiography**

Mice were anesthetized using 12  $\mu$ L/g BW of 2.5% avertin (Sigma-Aldrich), and echocardiography was performed using ultrasonography (Acuson Sequoia C256; Siemens Medical Solutions) as previously described <sup>7</sup>.

**Ischemia/reperfusion and prolonged ischemia**

Mice were housed in a temperature-controlled environment with 12-hr light/dark cycles where they received food and water ad libitum. Mice were anesthetized by intraperitoneal injection of pentobarbital sodium (50 mg/kg). A rodent ventilator (model 683; Harvard Apparatus Inc) was used with 65% oxygen during the surgical procedure. The animals were kept warm using heat lamps. Rectal temperature was monitored and maintained between 36 and 37°C. The chest was opened by a horizontal incision through the muscle between the ribs (third intercostal space).

Ischemia/reperfusion was achieved by ligating the anterior descending branch of the left coronary artery (LAD) using an 8-0 prolene suture, with a silicon tubing (1 mm OD) placed on top of the LAD, 2 mm below the border between left atrium and LV. Regional ischemia was confirmed by ECG change (ST elevation). After occlusion for 45 min, the silicon tubing was removed to achieve reperfusion and the rib space and overlying muscles were closed. When recovered from anesthesia, the mice were extubated and returned to their cages. They were given water and standard mouse food and housed in a climate-controlled environment. Prolonged ischemia was achieved by ligating the anterior descending branch of the left coronary artery (LAD) using an 8-0 prolene suture, and closing the wound. Evaluation of infarction size was done by TTC staining 24 hour after ischemia <sup>2</sup>. In order to evaluate the effect of Nampt upon prolonged ischemia, some mice were subjected to prolonged ischemia (2 hours) and euthanized without reperfusion.

**Assessment of area at risk and infarct size**

After intervention, the animals were reanesthetized and intubated, and the chest was opened. After arresting the heart at the diastolic phase by KCl injection, the ascending aorta was cannulated and perfused with saline to wash out blood. The LAD was occluded with the same suture, which had

been left at the site of the ligation. To demarcate the ischemic area at risk (AAR), Alcian blue dye (1%) was perfused into the aorta and coronary arteries. Hearts were excised, and LVs were sliced into 1-mm thick cross sections. The heart sections were then incubated with a 1% triphenyltetrazolium chloride solution at 37°C for 15 min. The infarct area (pale), the AAR (not blue), and the total LV area from both sides of each section were measured using Adobe Photoshop (Adobe Systems Inc.), and the values obtained were averaged. The percentage of area of infarction and AAR of each section were multiplied by the weight of the section and then totaled from all sections. AAR/LV and infarct area/AAR were expressed as percentages<sup>8</sup>.

#### **Evaluation of apoptosis in tissue sections**

DNA fragmentation was detected *in situ* using TUNEL, as described.<sup>9</sup> Briefly, deparaffinized sections were incubated with proteinase K, and DNA fragments were labeled with fluorescein-conjugated dUTP using TdT (Roche Molecular Biochemicals). Nuclear density was determined by manual counting of DAPI-stained nuclei in six fields for each animal using the 40x objective, and the number of TUNEL-positive nuclei was counted by examining the entire section using the same power objective.

**Supplemental Figures****Figure S1**

(A) Time course of Nampt expression in response to myocardial ischemia. C57/B6 mice were subjected to myocardial ischemia by coronary ligation. Heart samples were collected at indicated time points. Expression of Nampt and tubulin was evaluated by immunoblot analyses. (B)

Reversibility of Nampt downregulation after pressure overload. Mice were subjected to sham operation, aortic banding for one week, or aortic banding for one week followed by debanding for one week. Expression of Nampt and tubulin was evaluated by immunoblot analyses.

**Figure S2**

Cardiac myocytes were transduced with either Ad-LacZ or Ad-Nampt (A) or Ad-shRNA-scramble (control) or Ad-shRNA-Nampt (B) and cultured for 48 hours. Cell viability was measured after 4-hours of treatment with 1.2 mM methyl methanesulfonate (MMS) or glucose deprivation. Cell viability was evaluated by CellTiter-Blue Cell Viability Assays. Cell viability of myocytes transduced with Ad-LacZ without stress was expressed as 100%.

**Figure S3**

(A) The effect of Nampt knockdown on necrotic cell death. Neonatal rat cardiac myocytes were transduced with Ad-shRNA-Nampt (shNampt) or Ad-shRNA-scramble (ShControl) (3MOI) and cultured for 5 days. Myocytes treated with chelerythrine (CE, 100  $\mu$ M for 30 min) were used as a positive control for necrotic cell death. Cells were stained with propidium iodide for 5 min without cell permeabilization. (B) The effect of Nampt knockdown on necrotic cell death in response to glucose deprivation. Cardiac myocytes were transduced with Ad-shRNA-Nampt (shNampt) or Ad-shRNA-scramble (shControl or sh-con) (3MOI) and cultured for 5 days. Myocytes were then incubated with glucose free medium for 4 hours. Cells were stained with propidium iodide for 5



min without cell permeabilization.

#### **Figure S4**

The effect of Nampt knockdown on PARP activity. Cultured neonatal rat cardiac myocytes were transduced with Ad-shRNA-scramble (sh-scr) or Ad-shRNA-Nampt (sh-Nampt) (3MOI) and cultured for 5 days. Chelerythrine (100  $\mu$ M) was used as positive control. Samples were subjected to immunoblot analyses with anti-poly ADP-ribose polymer (PAR) antibody.

#### **Figure S5**

(A) Downregulation of Nampt does not affect p62 mRNA expression. Neonatal rat cardiac myocytes (NRCMs) were transduced with either Ad-shRNA-scramble or Ad-shRNA-Nampt at 3 MOI and cultured in serum-free conditions for 96 hours. mRNA expression of p62 was measured by RT-qPCR and normalized by S15RNA. The value in myocytes transduced with Ad-shRNA-scramble was expressed as 1. (B) Downregulation of Nampt does not further increase accumulation of LC3-II in the presence of chloroquine. Cardiac myocytes were transduced with Ad-shRNA-scramble or Ad-shRNA-Nampt at 3 MOI and cultured in serum-free conditions for 96 hours. Some myocytes were incubated with chloroquine (6  $\mu$ M) for 2 hours. Cell lysates were subjected to immunoblot analyses with anti-LC3 and anti-tubulin antibodies. Results are representative of three experiments.

#### **Figure S6**

Downregulation of Nampt does not significantly affect AMPK, p70S6K, 4E-BP1, Akt or mTOR phosphorylation in cardiac myocytes. Cardiac myocytes were transduced with Ad-shRNA-scramble or Ad-shRNA-Nampt at 3 MOI and cultured in serum or serum-free conditions for 96 hours. Cell lysates were subjected to immunoblot analyses with antibodies against phosphor-AMPK, AMPK, phospho-P70, P70, phospho-4E-BP1, 4E-BP1, phospho-mTOR,

mTOR, phospho-Akt, Akt, Beclin-1 and actin. Results are representative of four experiments.

**Figure S7**

Knockdown of Nampt decreases the activity of Sirt1. Myocytes were transduced with Ad-shRNA-scramble or Ad-shRNA-Nampt. Cell lysates were subjected to immunoblot analyses of acetylated-lysine proteins, acetyl-Histone H3 and hyperacetylated Histone H4 (Ponceau S staining shown as a loading control).

**Figure S8**

The level of [NAD<sup>+</sup>], [NADH], [NAD<sup>+</sup>]/[NADH] in the heart was measured using either 1-2 or 12-14 months old mice. Data are mean ± SEM obtained from 5-6 experiments.

**References**

1. Alcendor RR, Kirshenbaum LA, Imai S, Sadoshima J. Sir2 $\alpha$ , a longevity factor and a class III histone decetylase, is an essential endogenous inhibitor of apoptosis in cardiac myocytes. *Circ Res*. 2004;95:971-980.
2. Matsui Y, Takagi H, Qu X, Abdellatif M, Sakoda H, Asano T, Levine B, Sadoshima J. Distinct Roles of Autophagy in the Heart During Ischemia and Reperfusion. Roles of AMP-Activated Protein Kinase and Beclin 1 in Mediating Autophagy. *Circ Res*. 2007;100:914-922.
3. Morisco C, Zebrowski DC, Condorelli G, Tschlis P, Vatner SF, Sadoshima J. The akt-glycogen synthase kinase 3 $\beta$  pathway regulates transcription of atrial natriuretic factor induced by  $\beta$  adrenergic receptor stimulation in cardiac myocytes. *J. Biol. Chem*. 2000;275:14466-14475.
4. Yamamoto S, Seta K, Morisco C, Vatner SF, Sadoshima J. Chelerythrine Rapidly Induces Apoptosis through Generation of Reactive Oxygen Species in Cardiac Myocytes. *J Mol Cell Cardiol*. 2001;33:1829-1848.
5. Chimenti C, Kajstura J, Torella D, Urbanek K, Heleniak H, Colussi C, Di Meglio F, Nadal-Ginard B, Frustaci A, Leri A, Maseri A, Anversa P. Senescence and death of primitive cells and myocytes lead to premature cardiac aging and heart failure. *Circ Res*. 2003;93:604-613.
6. Matsuda T, Zhai P, Maejima Y, Hong C, Gao S, Tian B, Goto H, Takagi H, Tamamoti-Adachi T, Kitajima S, Sadoshima J. Phosphorylation of GSK-3 $\alpha$  is essential for myocyte proliferation in the heart under pressure overload. *Proc Natl Acad Sci U S A*. 2008;105:20900-20905.
7. Matsui Y, Nakano N, Shao D, Gao S, Luo W, Hong C, Zhai P, Holle E, Yu X, Yabuta N, Tao W, Wagner T, Nojima H, Sadoshima J. Lats2 Is a Negative Regulator of Myocyte Size in the Heart. *Circ Res*. 2008;103:1309-1318.
8. Odashima M, Usui S, Takagi H, Hong C, Liu J, Yokota M, Sadoshima J. Inhibition of endogenous Mst1 prevents apoptosis and cardiac dysfunction without affecting cardiac hypertrophy after myocardial infarction. *Circ Res*. 2007;100:1344-1352.
9. Yamamoto S, Yang G, Zablocki D, Liu J, Hong C, Kim SJ, Soler S, Odashima M, Thaisz J, Yehia G, Molina CA, Yatani A, Vatner DE, Vatner SF, Sadoshima J. Activation of Mst1 causes dilated cardiomyopathy by stimulating apoptosis without compensatory ventricular myocyte hypertrophy. *J Clin Invest*. 2003;111:1463-1474.

**Table S1****Gravimetric Parameters of Tg-Nampt (Line 9) at 3 Months of Age**

| <b>Group</b>            | <b>WT (N=5)</b>  | <b>Tg (N=5)</b>  |
|-------------------------|------------------|------------------|
| <b>HW/BW (mg/g)</b>     | <b>3.98±0.02</b> | <b>3.84±0.01</b> |
| <b>LV/BW (mg/g)</b>     | <b>2.75±0.03</b> | <b>2.67±0.05</b> |
| <b>RV/BW (mg/g)</b>     | <b>0.69±0.01</b> | <b>0.66±0.01</b> |
| <b>Atrium/BW (mg/g)</b> | <b>0.37±0.02</b> | <b>0.31±0.02</b> |
| <b>Lung/BW (mg/g)</b>   | <b>4.99±0.06</b> | <b>4.80±0.07</b> |

**Table S2****Echocardiographic Analysis of Tg-Nampt (Line 9) at 3 Months of Age**

| <b>Group</b>        | <b>WT (N=6)</b>  | <b>Tg (N=6)</b>  |
|---------------------|------------------|------------------|
| <b>DSEP WT (mm)</b> | <b>0.85±0.03</b> | <b>0.83±0.03</b> |
| <b>LVEDD (mm)</b>   | <b>3.70±0.08</b> | <b>3.68±0.09</b> |
| <b>DPW WT (mm)</b>  | <b>0.81±0.02</b> | <b>0.78±0.02</b> |
| <b>SSEP WT (mm)</b> | <b>1.32±0.06</b> | <b>1.30±0.03</b> |
| <b>LVESD (mm)</b>   | <b>2.43±0.06</b> | <b>2.28±0.08</b> |
| <b>SPW WT (mm)</b>  | <b>1.11±0.02</b> | <b>1.10±0.03</b> |
| <b>EF (%)</b>       | <b>71.6±2.1</b>  | <b>75.5±2.5</b>  |
| <b>FS (%)</b>       | <b>34.5±1.6</b>  | <b>37.8±2.2</b>  |
| <b>HR (bpm)</b>     | <b>474±31</b>    | <b>470±19</b>    |

Supplemental  
Figure S1

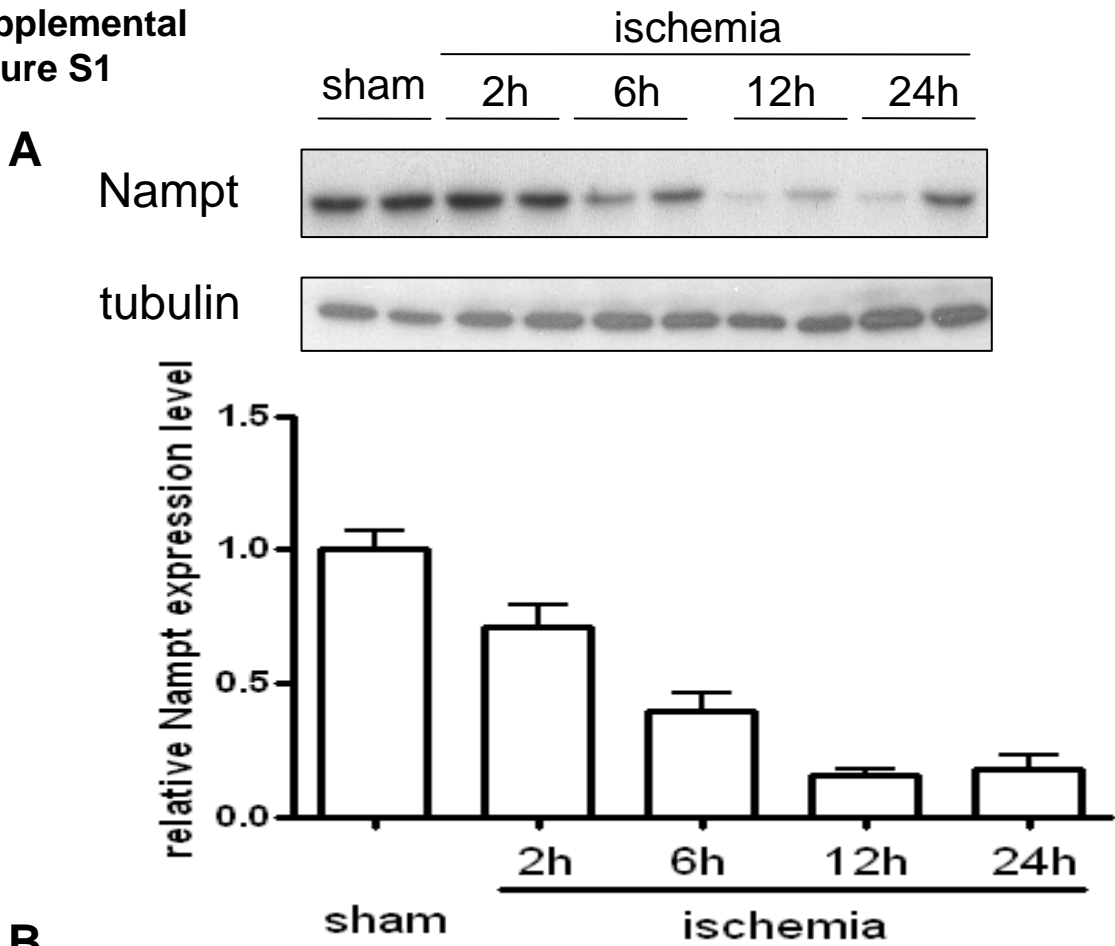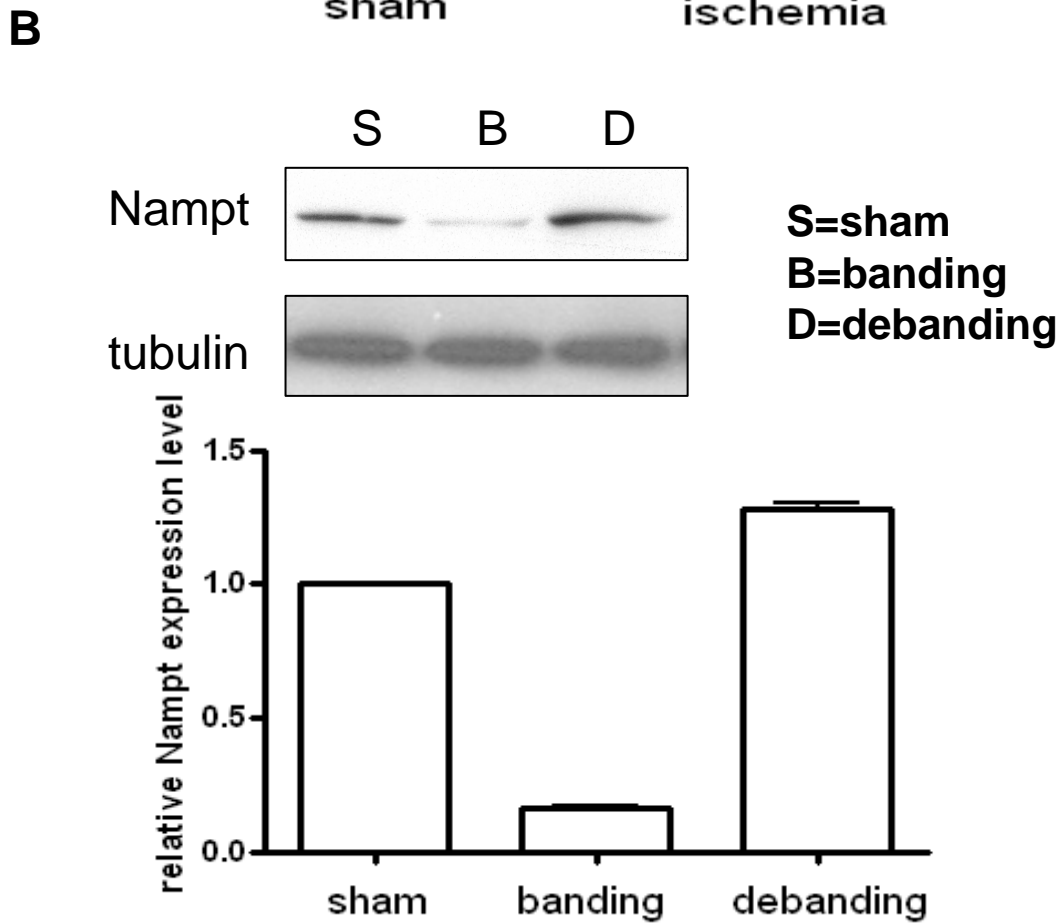

Supplemental  
Figure S2

**A**

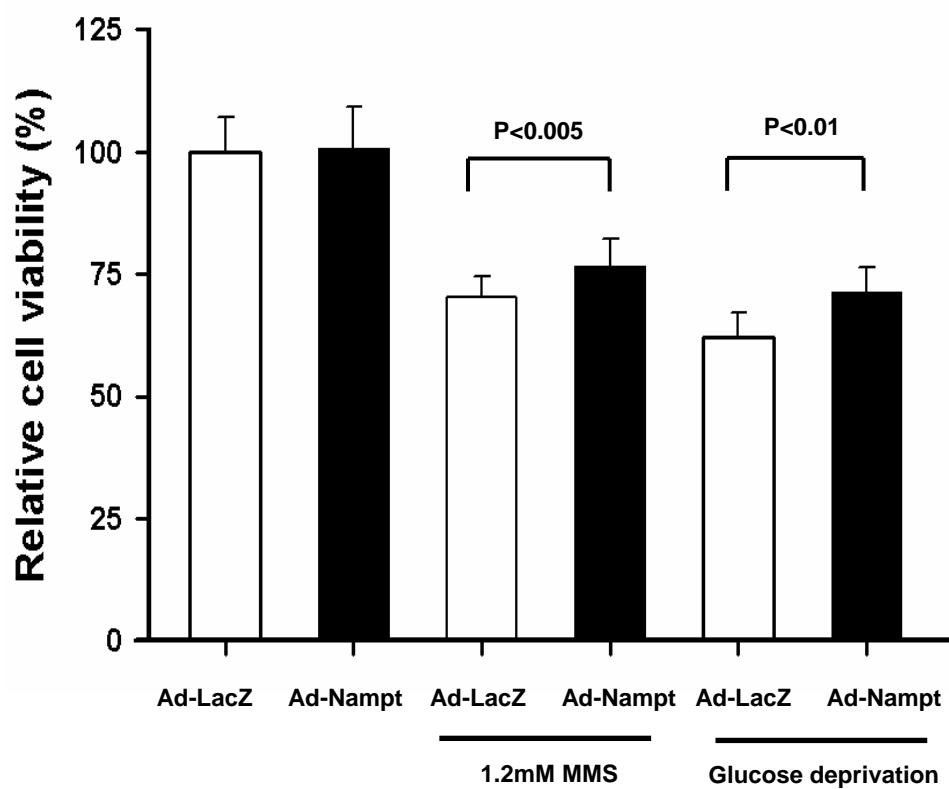

**B**

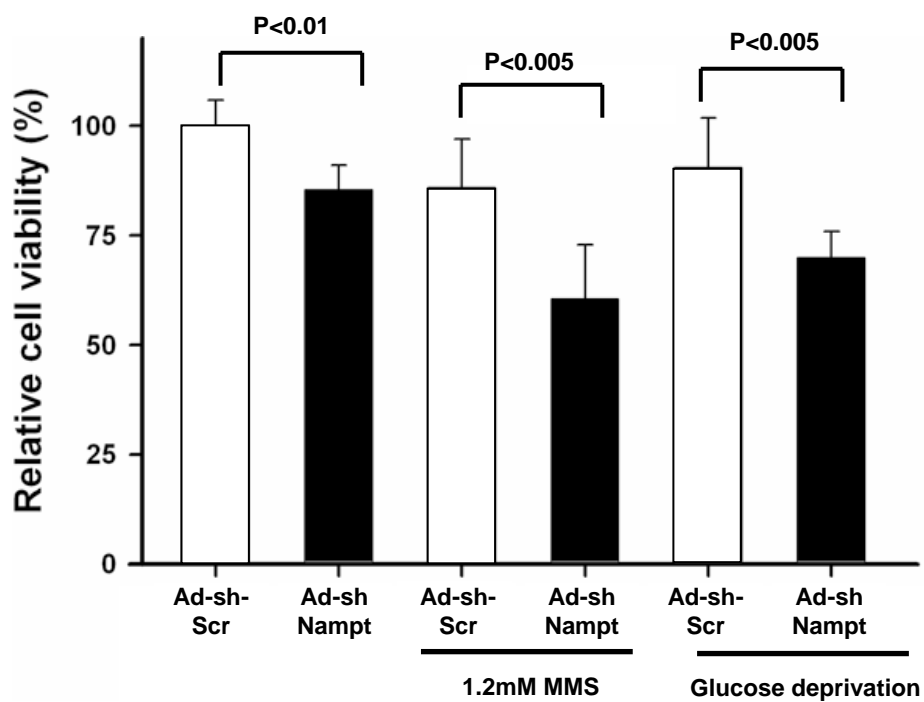

# Supplemental Figure S3

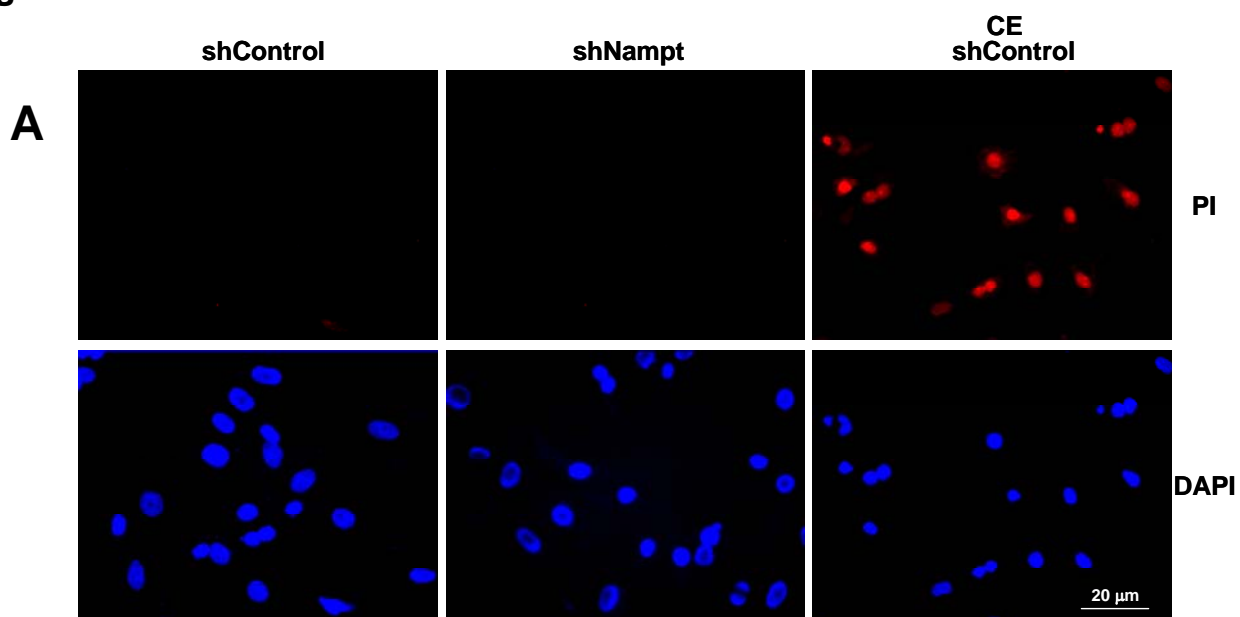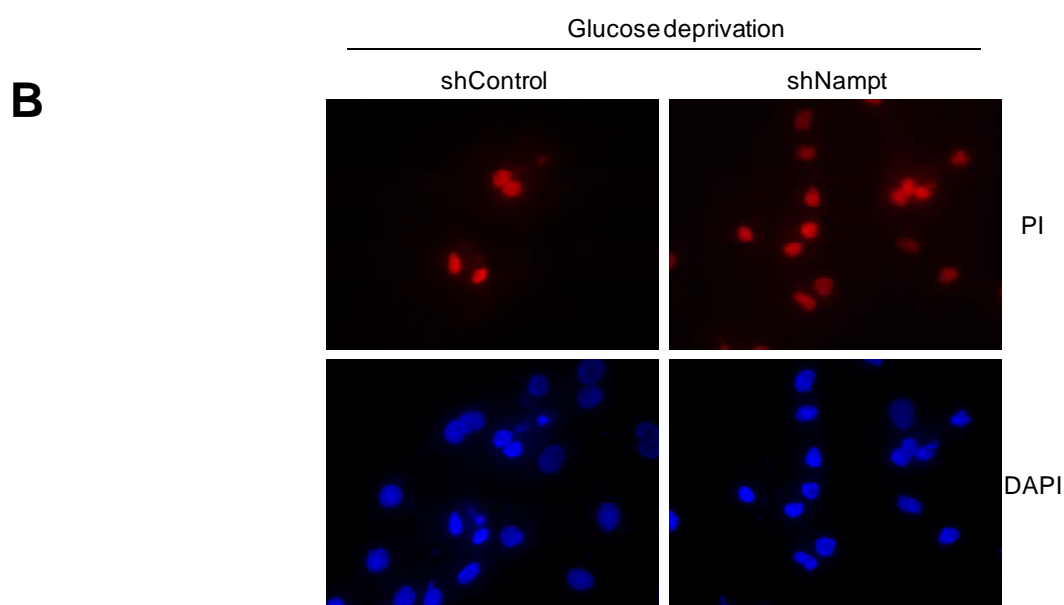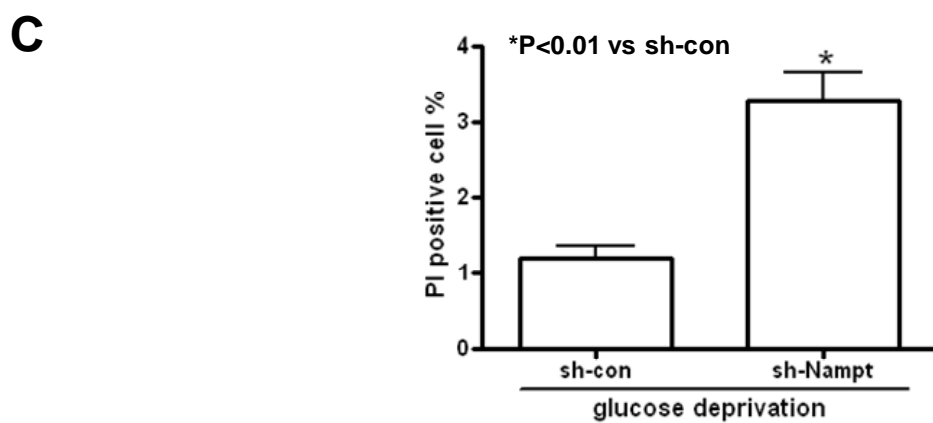

**Supplemental  
Figure S4**

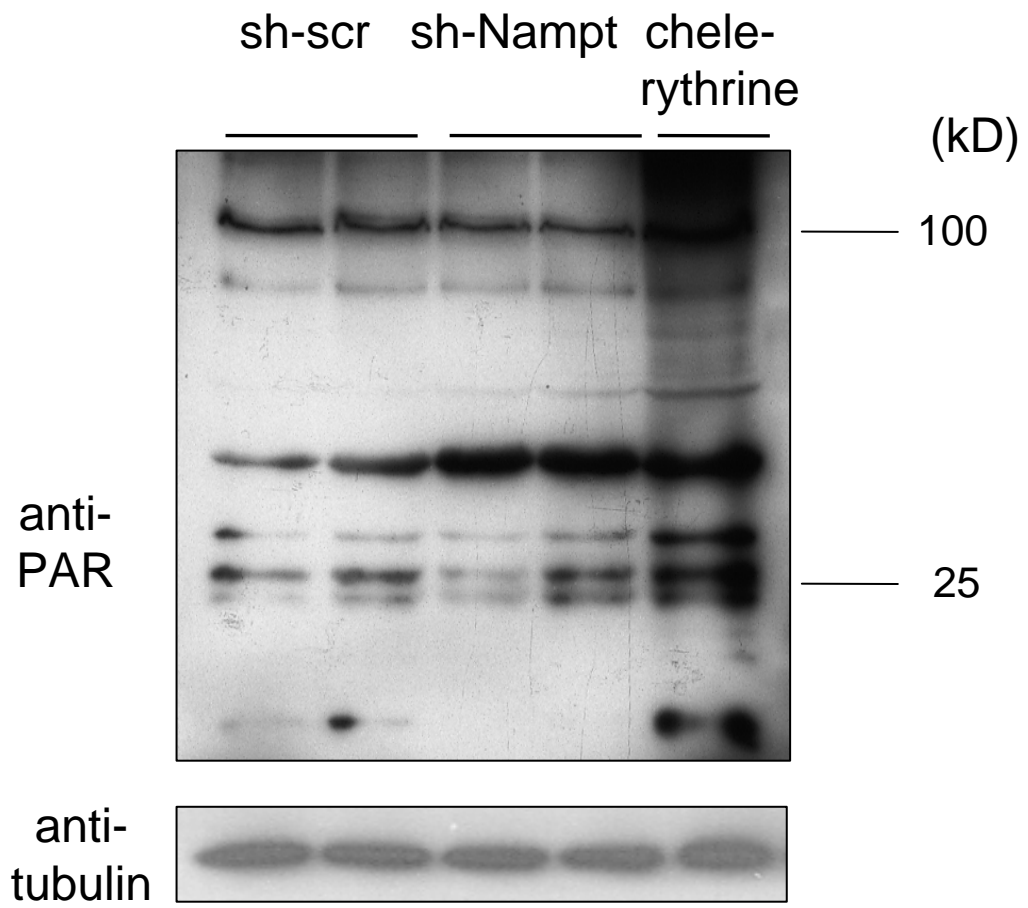



**Supplemental  
Figure S5**

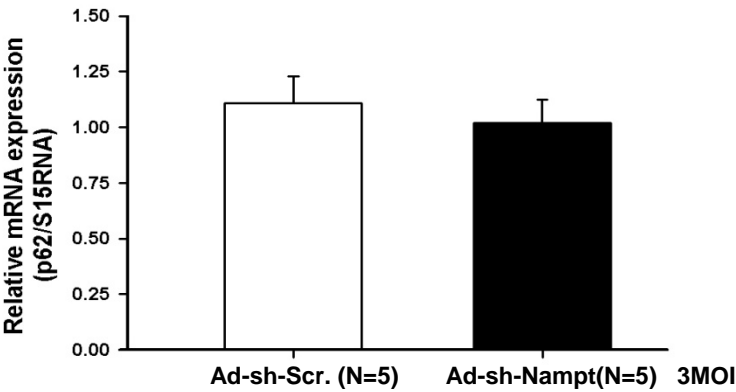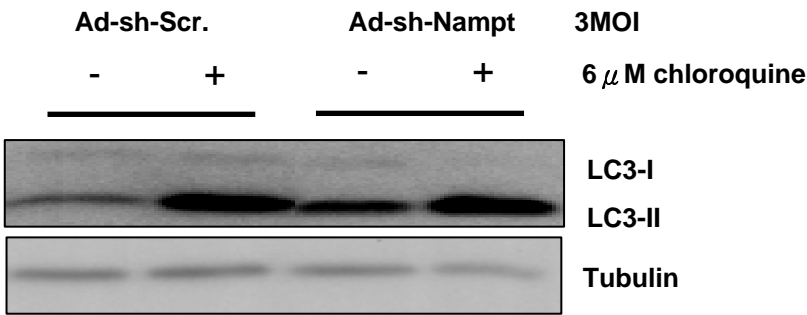

**Supplement  
Figure S6**

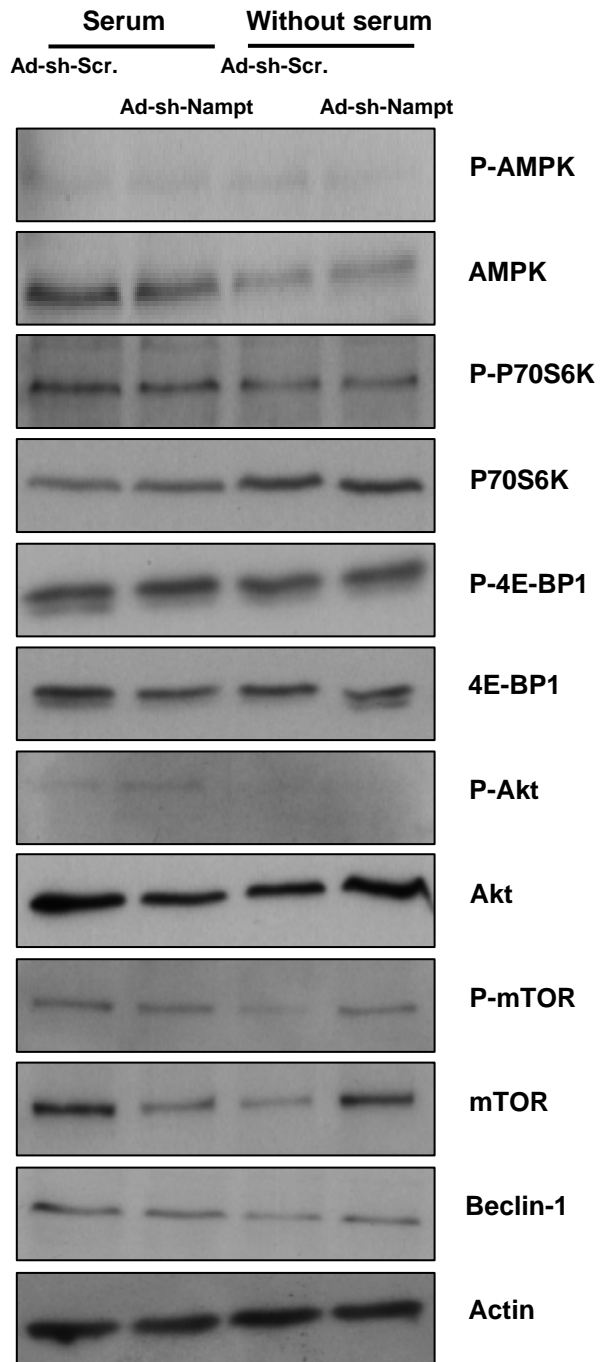

**Supplemental  
Figure S7**

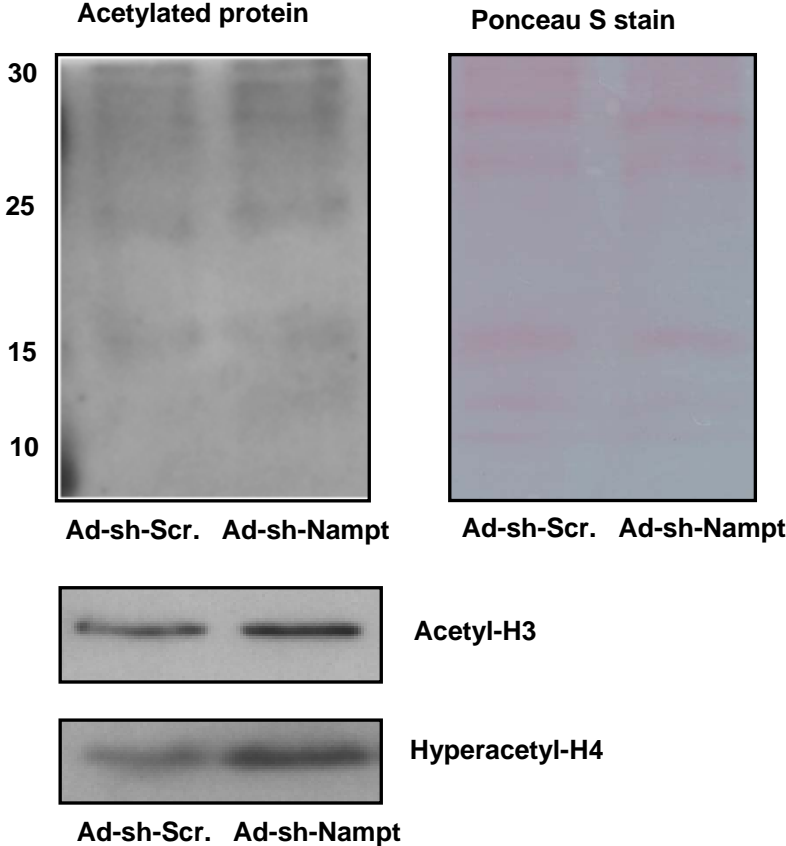

**Supplemental  
Figure S8**

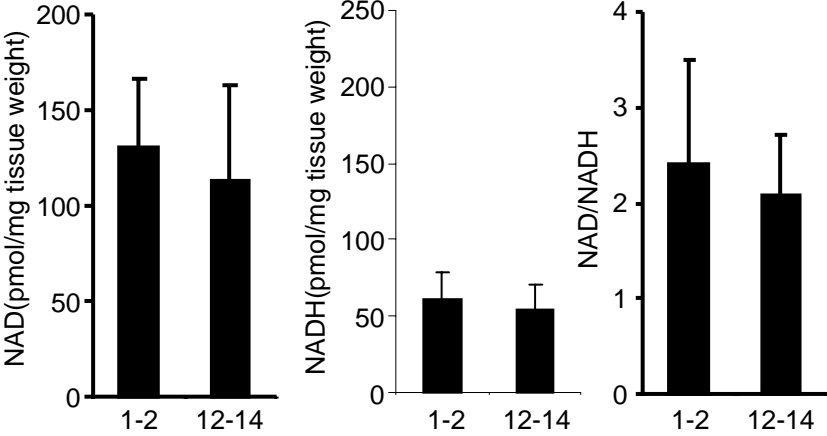

Supplement: NIHMS139822-supplement-01.pdf [file NIHMS139822-supplement-01.pdf]
